# Supplementary material for: Ferroptosis Induction in Multiple Myeloma Cells Triggers DNA Methylation and Histone Modification Changes Associated with Cellular Senescence
Source: MDPI journal article supplement (doi:10.3390/ijms222212234), 2021-11-12
Supplement: s1 [file s1]

## Supplementary Materials

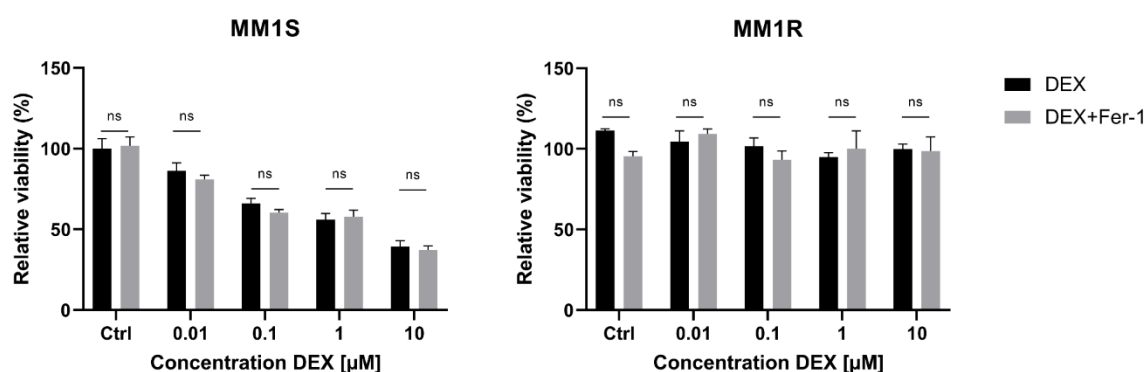

**Figure S1.** Relative viability of MM1S (left) and MM1R (right) cells upon 24 h exposure to increasing concentrations of dexamethasone (DEX) with or without pre-treatment with ferrostatin-1 (Fer-1). Data are plotted as the mean  $\pm$  s.d.,  $n = 3$  biologically independent replicates (ns  $p > 0.05$ , ANOVA).

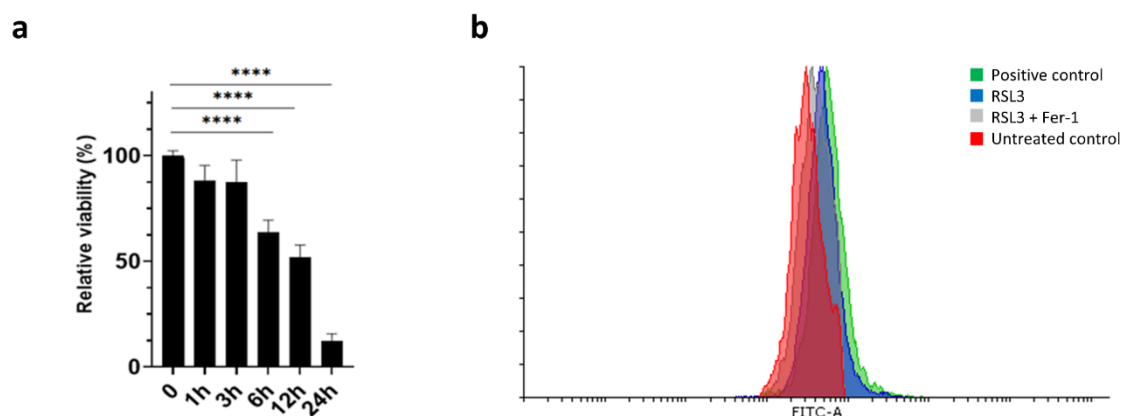

**Figure S2.** (a) Time-dependent relative viability of MM1 cells after 5  $\mu$ M RSL3 treatment. Data are plotted as the mean  $\pm$  s.d.,  $n = 3$  biologically independent replicates (\*\*\*\* $p < 0.0001$ , ANOVA). (b) Flow cytometric analysis of the lipid peroxidation sensor (C11-BODIPY-581/591 dye) on live MM1R cells after 3h treatment with 5  $\mu$ M RSL3 with or without pre-treatment with 2  $\mu$ M ferrostatin-1 (Fer-1) or 100  $\mu$ M cumene hydroxide (positive control).

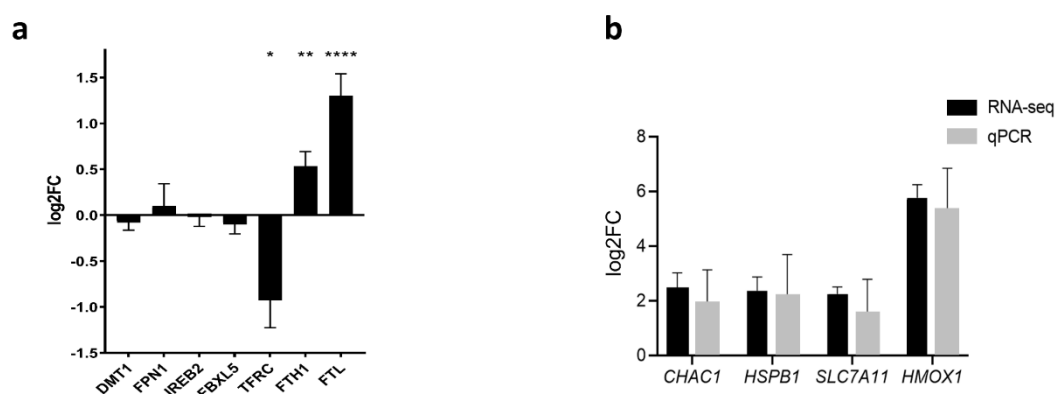

**Figure S3.** (a) Log2FC of iron-responsive genes in RSL3-treated MM1 cells versus untreated controls as determined by RNAseq. Data are plotted as the mean log2FC  $\pm$  SEM,  $n = 3$  biologically independent replicates per cell line (\* $p < 0.05$ , \*\* $p < 0.01$ , \*\*\*\* $p < 0.0001$ , ANOVA). (b) Comparison of log2FC of RNAseq and qPCR analysis of 4 ferroptosis-related genes. Data are plotted as the mean  $\pm$  s.d.,  $n = 3$  biologically independent replicates per cell line.

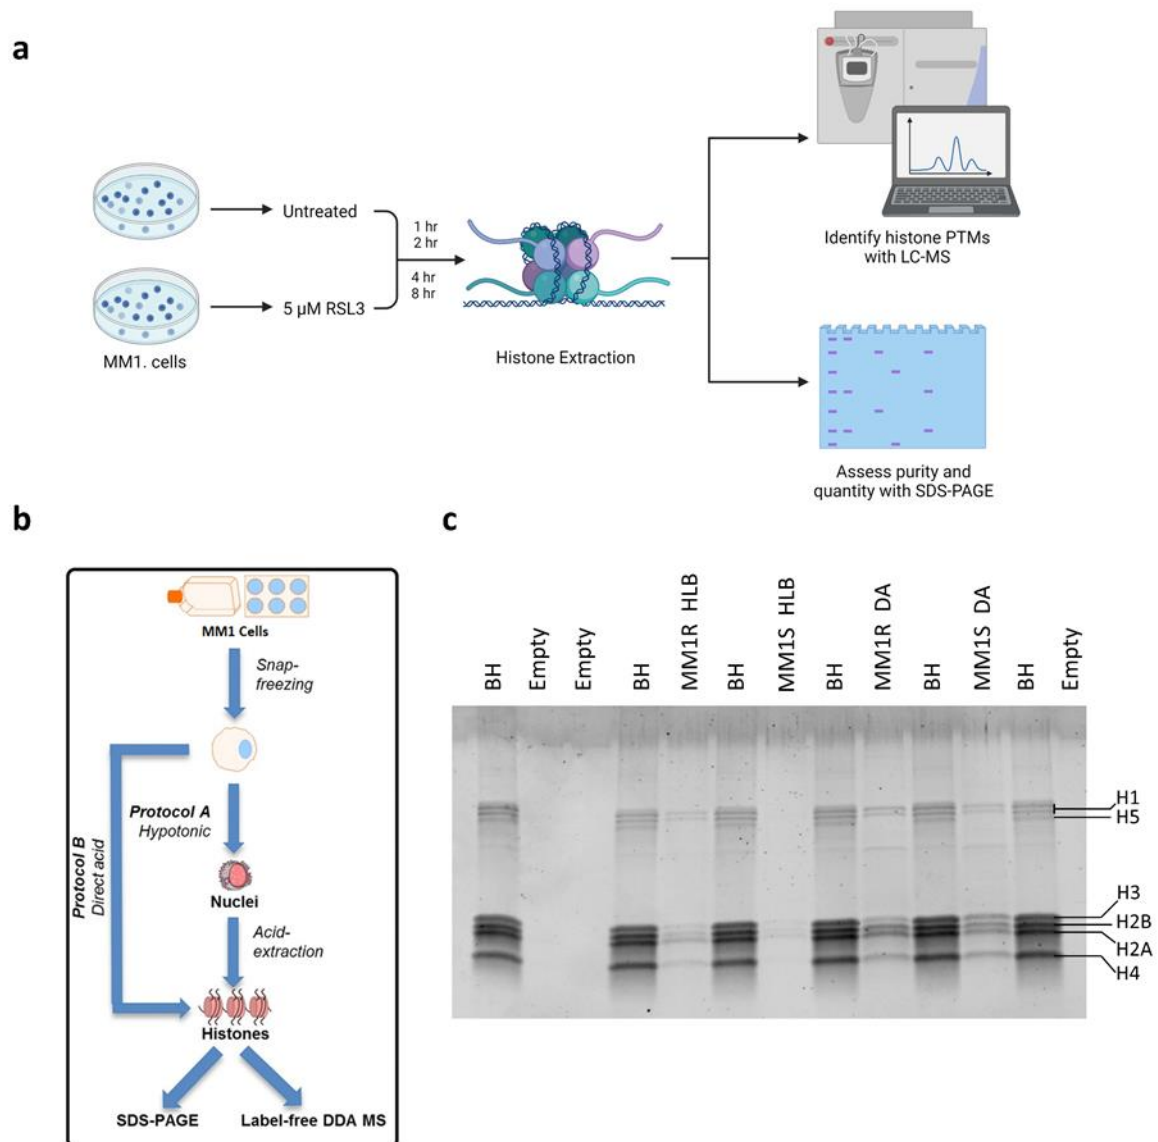

**Figure S4.** Histone extraction optimization from MM1 cells for LC-MS analysis of post-translational modifications (PTMs). (a) Experimental pipeline for identification of histone PTMs with liquid chromatography-mass spectrometry (LC-MS). Prior to LC-MS analysis, purity and quantity of histone extracts is assessed with polyacrylamide gel electrophoresis (PAGE). (b) Lysis protocols that were explored for histone extraction from MM1 cells. Adapted from [108]. (c) Purity of MM1 histone extracts obtained with either hypotonic lysis buffer (HLB) or direct acid lysis (DA). Extracts from  $4 \times 10^5$  cells were loaded onto a 8–16% gradient gel and compared to a 2  $\mu$ g bovine histone (BH) commercial standard.

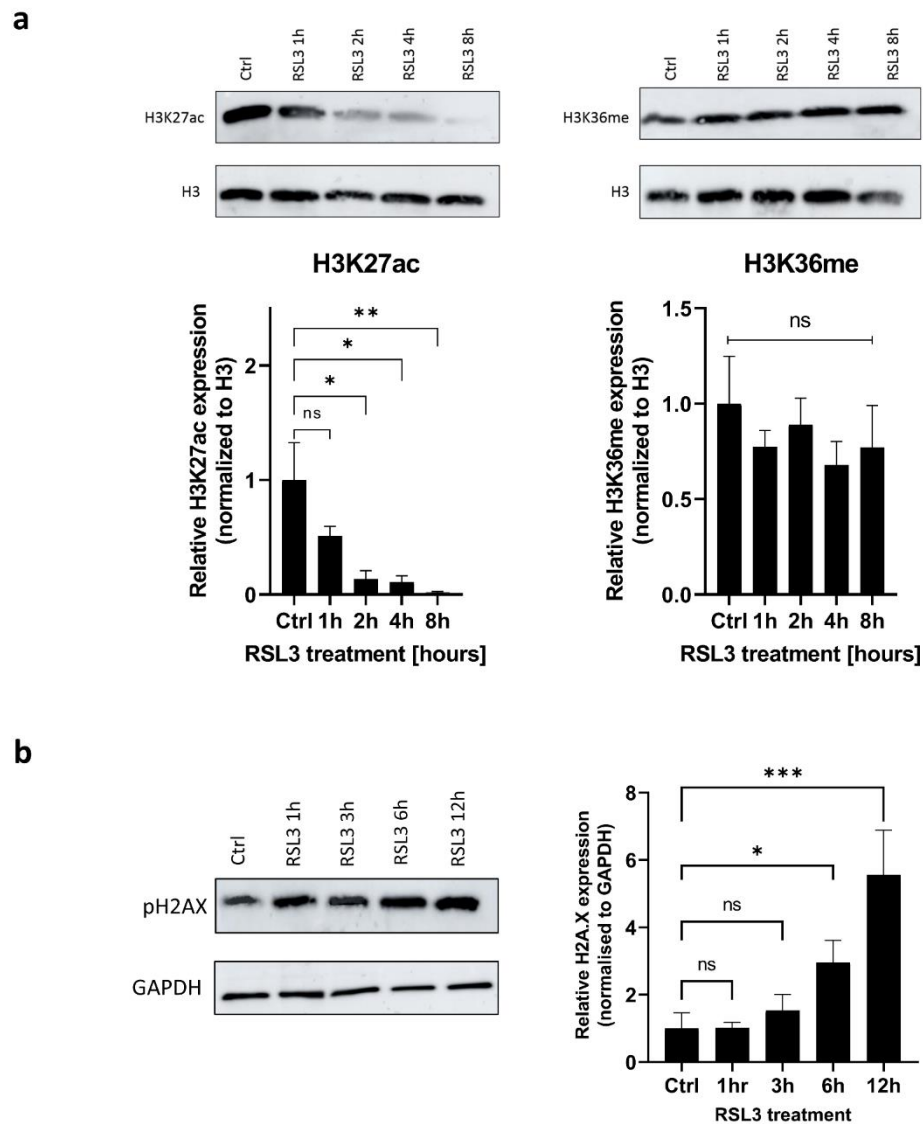

**Figure S5. (a)** Western blot validation of histone proteomics LC-MS data. H3K27ac (left) was significantly upregulated upon RSL3 treatment in MM1 cells while H3K36me3 (right) levels remained unchanged, both in LC-MS and western blot analysis. **(b)** Western blot detection and quantification of pH2AX and GAPDH expression levels after RSL3 treatment in MM1 cells. Data are plotted as the mean  $\pm$  s.d.,  $n = 3$  biologically independent replicates. (ns  $p > 0.05$ , \* $p < 0.05$ , \*\* $p < 0.01$ , \*\*\* $p < 0.001$  ANOVA).

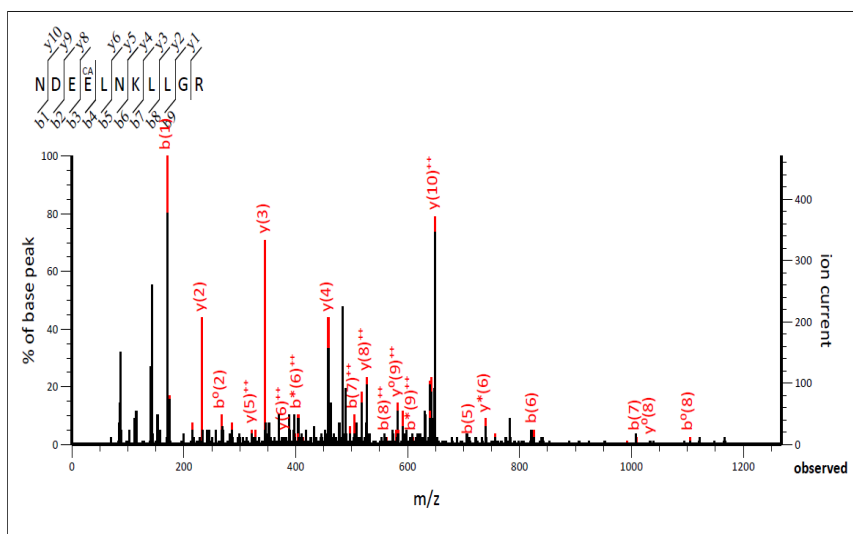

Monoisotopic mass of neutral peptide Mr(calc): 1465.6500  
 Fixed modifications: Propionyl (K),Propionyl (N-term) (apply to specified residues or termini only)  
 Variable modifications:  
 E4 : Cation:Fe[II] (DE)  
 Ions Score: 24 Expect: 0.0061 ([help](#))

| #  | b         | b <sup>++</sup> | b <sup>*</sup> | b <sup>+++</sup> | b <sup>0</sup> | b <sup>0++</sup> | Seq. | y         | y <sup>++</sup> | y <sup>*</sup> | y <sup>+++</sup> | y <sup>0</sup> | y <sup>0++</sup> | #  |
|----|-----------|-----------------|----------------|------------------|----------------|------------------|------|-----------|-----------------|----------------|------------------|----------------|------------------|----|
| 1  | 171.0764  | 86.0418         | 154.0499       | 77.5286          |                |                  | N    |           |                 |                |                  |                |                  | 11 |
| 2  | 286.1034  | 143.5553        | 269.0768       | 135.0420         | 268.0928       | 134.5500         | D    | 1296.5881 | 648.7977        | 1279.5616      | 640.2844         | 1278.5776      | 639.7924         | 10 |
| 3  | 415.1460  | 208.0766        | 398.1194       | 199.5633         | 397.1354       | 199.0713         | E    | 1181.5612 | 591.2842        | 1164.5346      | 582.7710         | 1163.5506      | 582.2789         | 9  |
| 4  | 598.1078  | 299.5576        | 581.0813       | 291.0443         | 580.0973       | 290.5523         | E    | 1052.5186 | 526.7629        | 1035.4920      | 518.2497         | 1034.5080      | 517.7577         | 8  |
| 5  | 711.1919  | 356.0996        | 694.1654       | 347.5863         | 693.1813       | 347.0943         | L    | 869.5567  | 435.2820        | 852.5302       | 426.7687         |                |                  | 7  |
| 6  | 825.2348  | 413.1211        | 808.2083       | 404.6078         | 807.2243       | 404.1158         | N    | 756.4726  | 378.7400        | 739.4461       | 370.2267         |                |                  | 6  |
| 7  | 1009.3560 | 505.1816        | 992.3295       | 496.6684         | 991.3454       | 496.1764         | K    | 642.4297  | 321.7185        | 625.4032       | 313.2052         |                |                  | 5  |
| 8  | 1122.4401 | 561.7237        | 1105.4135      | 553.2104         | 1104.4295      | 552.7184         | L    | 458.3085  | 229.6579        | 441.2820       | 221.1446         |                |                  | 4  |
| 9  | 1235.5241 | 618.2657        | 1218.4976      | 609.7524         | 1217.5136      | 609.2604         | L    | 345.2245  | 173.1159        | 328.1979       | 164.6026         |                |                  | 3  |
| 10 | 1292.5456 | 646.7764        | 1275.5190      | 638.2632         | 1274.5350      | 637.7712         | G    | 232.1404  | 116.5738        | 215.1139       | 108.0606         |                |                  | 2  |
| 11 |           |                 |                |                  |                |                  | R    | 175.1190  | 88.0631         | 158.0924       | 79.5498          |                |                  | 1  |

(a)

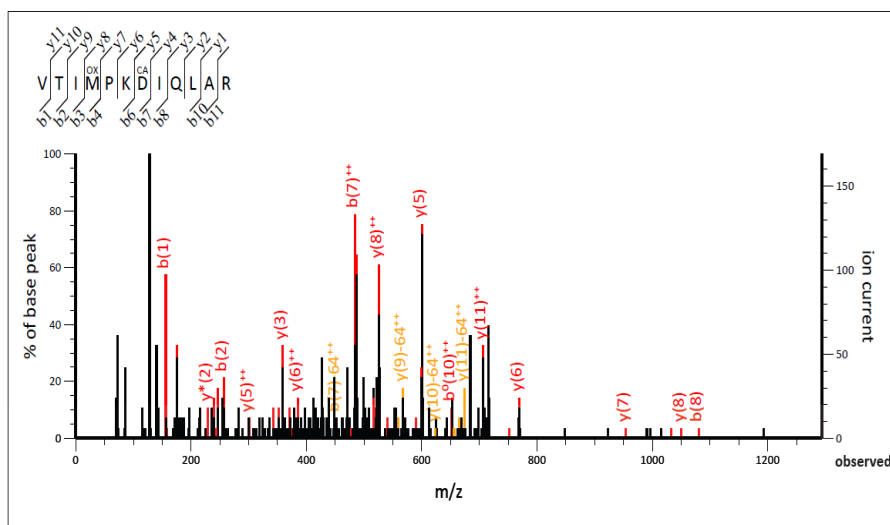

Monoisotopic mass of neutral peptide Mr(calc): 1565.7574  
 Fixed modifications: Propionyl (K),Propionyl (N-term) (apply to specified residues or termini only)  
 Variable modifications:  
 M4 : Oxidation (M), with neutral losses 0.0000(shown in table), 63.9983  
 D7 : Cation:Fe[II] (DE)  
 Ions Score: 39 Expect: 0.00047 ([help](#))

| #  | b         | b <sup>++</sup> | b <sup>*</sup> | b <sup>*++</sup> | b <sup>0</sup> | b <sup>0++</sup> | Seq. | y         | y <sup>++</sup> | y <sup>*</sup> | y <sup>*++</sup> | y <sup>0</sup> | y <sup>0++</sup> | #  |
|----|-----------|-----------------|----------------|------------------|----------------|------------------|------|-----------|-----------------|----------------|------------------|----------------|------------------|----|
| 1  | 156.1019  | 78.5546         |                |                  |                |                  | V    |           |                 |                |                  |                |                  | 12 |
| 2  | 257.1496  | 129.0784        |                |                  | 239.1390       | 120.0731         | T    | 1411.6701 | 706.3387        | 1394.6435      | 697.8254         | 1393.6595      | 697.3334         | 11 |
| 3  | 370.2336  | 185.6205        |                |                  | 352.2231       | 176.6152         | I    | 1310.6224 | 655.8148        | 1293.5959      | 647.3016         | 1292.6118      | 646.8096         | 10 |
| 4  | 517.2690  | 259.1382        |                |                  | 499.2585       | 250.1329         | M    | 1197.5383 | 599.2728        | 1180.5118      | 590.7595         | 1179.5278      | 590.2675         | 9  |
| 5  | 614.3218  | 307.6645        |                |                  | 596.3112       | 298.6593         | P    | 1050.5029 | 525.7551        | 1033.4764      | 517.2418         | 1032.4924      | 516.7498         | 8  |
| 6  | 798.4430  | 399.7251        | 781.4164       | 391.2119         | 780.4324       | 390.7199         | K    | 953.4502  | 477.2287        | 936.4236       | 468.7155         | 935.4396       | 468.2234         | 7  |
| 7  | 967.3892  | 484.1982        | 950.3627       | 475.6850         | 949.3787       | 475.1930         | D    | 769.3290  | 385.1681        | 752.3025       | 376.6549         | 751.3184       | 376.1629         | 6  |
| 8  | 1080.4733 | 540.7403        | 1063.4467      | 532.2270         | 1062.4627      | 531.7350         | I    | 600.3828  | 300.6950        | 583.3562       | 292.1817         |                |                  | 5  |
| 9  | 1208.5319 | 604.7696        | 1191.5053      | 596.2563         | 1190.5213      | 595.7643         | Q    | 487.2987  | 244.1530        | 470.2722       | 235.6397         |                |                  | 4  |
| 10 | 1321.6159 | 661.3116        | 1304.5894      | 652.7983         | 1303.6054      | 652.3063         | L    | 359.2401  | 180.1237        | 342.2136       | 171.6104         |                |                  | 3  |
| 11 | 1392.6530 | 696.8302        | 1375.6265      | 688.3169         | 1374.6425      | 687.8249         | A    | 246.1561  | 123.5817        | 229.1295       | 115.0684         |                |                  | 2  |
| 12 |           |                 |                |                  |                |                  | R    | 175.1190  | 88.0631         | 158.0924       | 79.5498          |                |                  | 1  |

(b)

**Figure S6.** Annotated MS/MS spectra of H3 (a) and H2A (b) proteins isolated from RSL3-treated MM1 cells. Annotated spectra indicate Fe<sup>2+</sup> binding to glutamate (E) and aspartate (D) residues of H2A and H3.

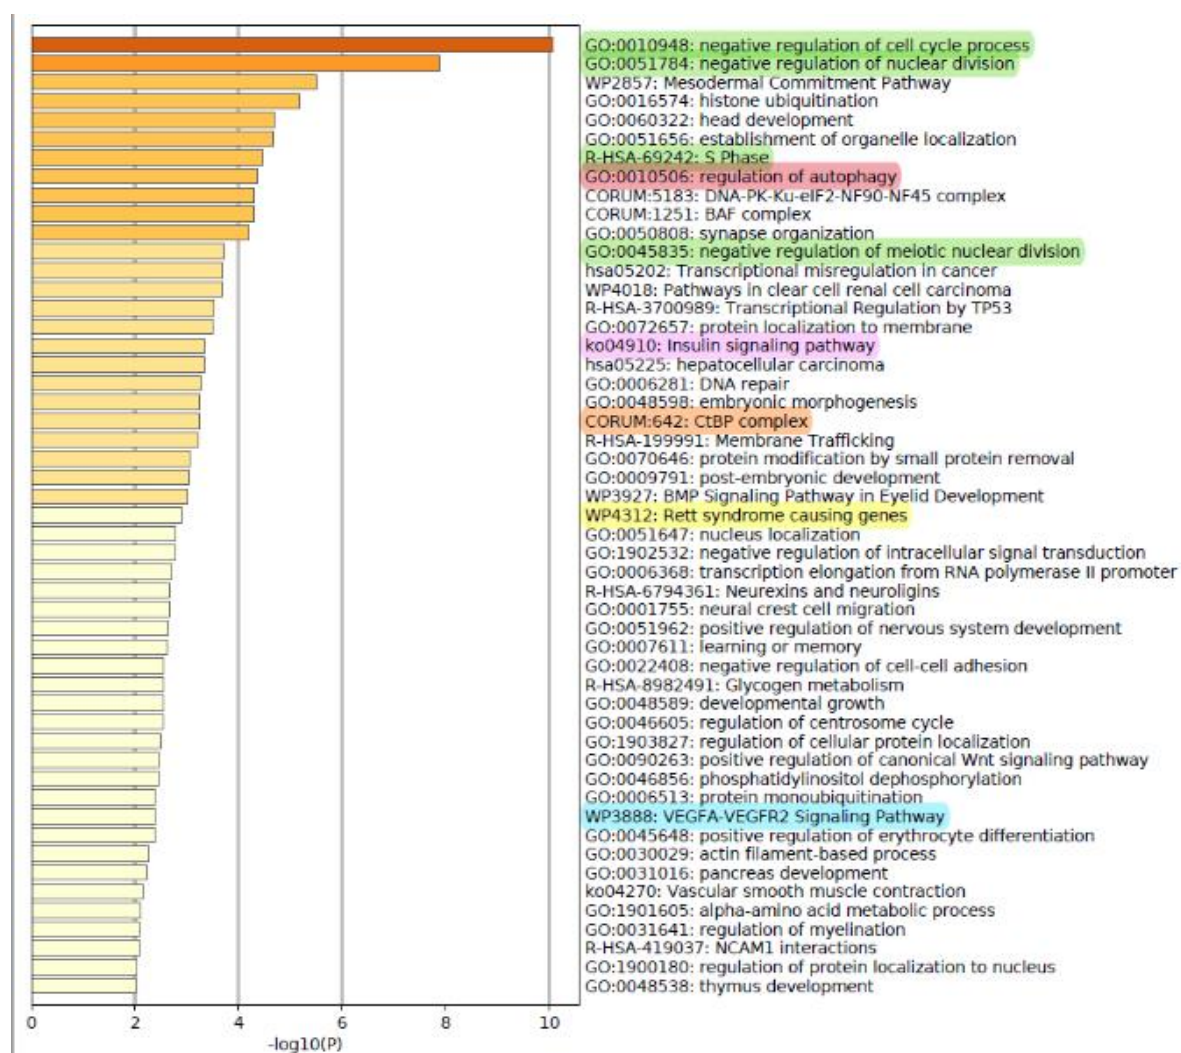

**Figure S7.** Metascape pathway enrichment of significantly differentially methylated CpG probes (FDR < 0.05 &  $\Delta\beta$  differences > 0.1) in RSL3-treated MM1S cells compared to Ferrostatin-1 pre-treated, RSL3-treated MM1S cells. Terms marked in color are common pathways between MM1S and MM1R cells (see Figure S6).



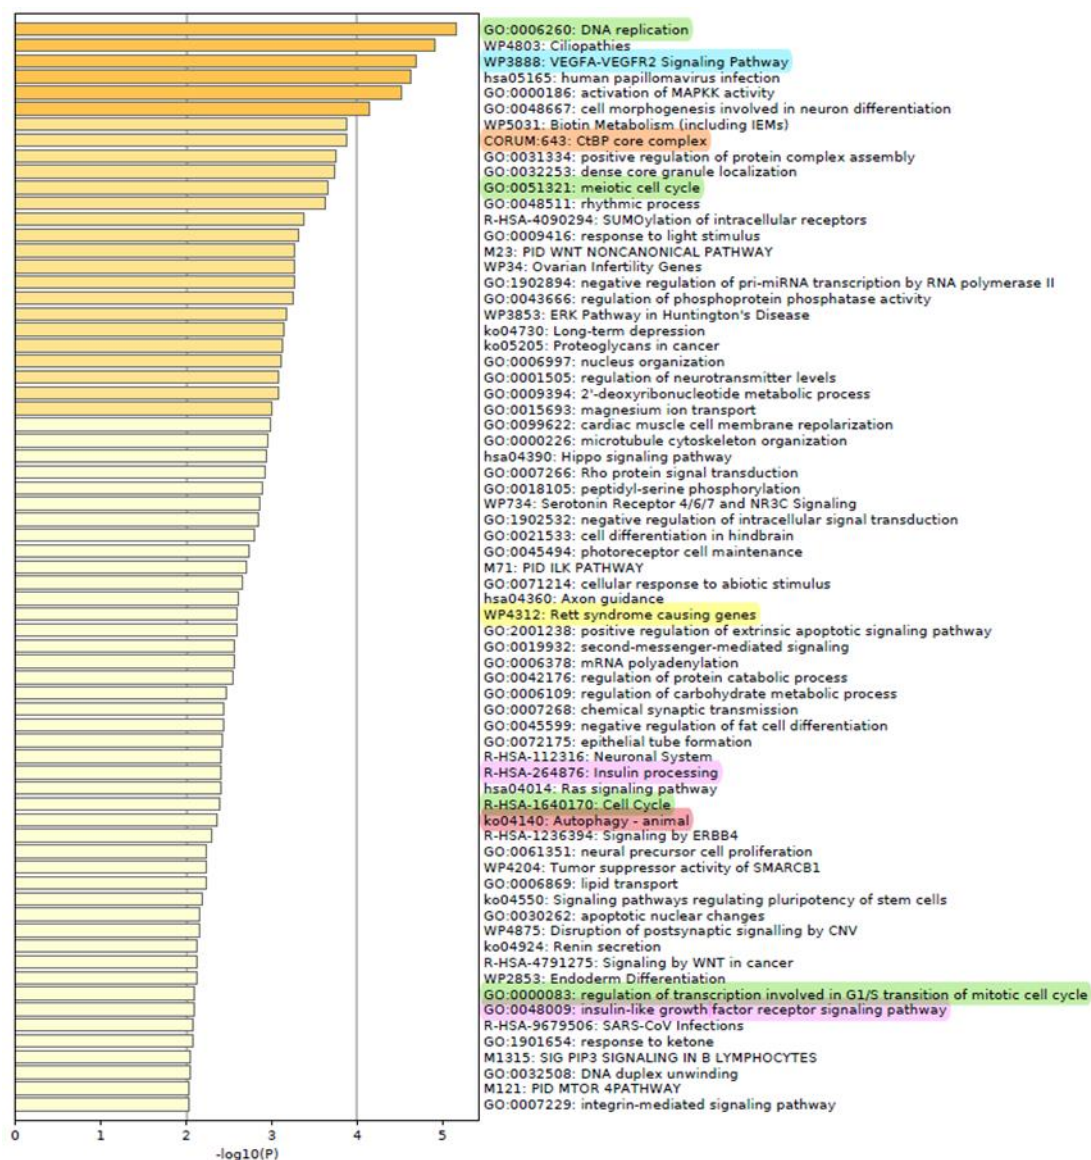

**Figure S8:** Metascape pathway enrichment of significantly differentially methylated CpG probes ( $FDR < 0.05$  &  $\Delta\beta$  differences  $> 0.1$ ) in RSL3-treated MM1R cells compared to Ferrostatin-1 pre-treated, RSL3-treated MM1S cells. Terms marked in color are common pathways between MM1S and MM1R cells (see Figure S5).

**Table S1.** Overview of significantly altered histone PTMs in RSL3-treated MM1 cells compared to untreated controls.

| Histone | PTM                | Sequence                                             | Log2FC |       |       |       | p-Value               |                       |                       |                       |
|---------|--------------------|------------------------------------------------------|--------|-------|-------|-------|-----------------------|-----------------------|-----------------------|-----------------------|
|         |                    |                                                      | 1 h    | 2 h   | 4 h   | 8 h   | 1 h                   | 2 h                   | 4 h                   | 8 h                   |
| H2A     | E57Fe              | VGA-<br>GAPVYMAAVLEYLTAEILE<br>LAGNAAR               | 0,20   | 0,61  | 0,69  | 0,56  | $3,70 \times 10^{-1}$ | $1,46 \times 10^{-3}$ | $1,75 \times 10^{-4}$ | $5,90 \times 10^{-3}$ |
|         | R89Cit             | HLQLAIRNDEELNKLLGR                                   | -0,15  | -0,63 | -0,47 | -0,53 | $4,51 \times 10^{-1}$ | $1,27 \times 10^{-2}$ | $5,28 \times 10^{-2}$ | $3,54 \times 10^{-2}$ |
|         | E93Fe              | NDEELNKLLGR                                          | 0,32   | 0,63  | 0,80  | 0,90  | $1,21 \times 10^{-1}$ | $6,33 \times 10^{-4}$ | $1,93 \times 10^{-5}$ | $1,84 \times 10^{-4}$ |
|         | K96Ac              | HLQLAIRNDEELNKLLGK                                   | 0,52   | 2,26  | 2,86  | 1,93  | $2,99 \times 10^{-1}$ | $5,55 \times 10^{-3}$ | $1,37 \times 10^{-3}$ | $1,17 \times 10^{-2}$ |
|         | K100Ac             | HLQLAIRNDEELNKLLGK                                   | 0,52   | 2,26  | 2,86  | 1,93  | $2,99 \times 10^{-1}$ | $5,55 \times 10^{-3}$ | $1,37 \times 10^{-3}$ | $1,17 \times 10^{-2}$ |
|         | K100But            | HLQLAIRNDEELNKLLGK                                   | 0,52   | 2,26  | 2,86  | 1,93  | $2,99 \times 10^{-1}$ | $5,55 \times 10^{-3}$ | $1,37 \times 10^{-3}$ | $1,17 \times 10^{-2}$ |
| H2A.Z   | K8Ac               | AGGKAGKDSGKAKA-<br>KAVSR                             | 0,08   | -0,14 | -0,23 | -0,61 | $6,84 \times 10^{-1}$ | $4,78 \times 10^{-1}$ | $2,78 \times 10^{-1}$ | $1,68 \times 10^{-2}$ |
|         | K14Ac              | AGGKAGKDSGKAKA-<br>KAVSR                             | -0,77  | -2,49 | -2,32 | -2,08 | $2,29 \times 10^{-1}$ | $1,36 \times 10^{-2}$ | $1,61 \times 10^{-2}$ | $2,81 \times 10^{-2}$ |
|         | K16S <sub>uc</sub> | AGGKAGKDSGKAKA-<br>KAVSR                             | -0,77  | -2,49 | -2,32 | -2,08 | $2,29 \times 10^{-1}$ | $1,36 \times 10^{-2}$ | $1,61 \times 10^{-2}$ | $2,81 \times 10^{-2}$ |
|         | K16H <sub>ib</sub> | AGGKAGKDSGKAKA-<br>KAVSR                             | -0,43  | -3,28 | -2,15 | -2,15 | $5,66 \times 10^{-1}$ | $3,18 \times 10^{-2}$ | $6,74 \times 10^{-2}$ | $8,32 \times 10^{-2}$ |
|         | K102Hib            | HLQLAIRGDEELDSLKATI-<br>AGGGVIPHIHKSIGKKGQ<br>QKTA   | -0,08  | -0,56 | -0,98 | -0,84 | $8,10 \times 10^{-1}$ | $1,21 \times 10^{-1}$ | $1,94 \times 10^{-2}$ | $4,04 \times 10^{-2}$ |
|         | K120Cro            | HLQLAIRGDEELDSLKATI-<br>AGGGVIPHIHKSIGKKGQ<br>QKTA   | -0,08  | -0,56 | -0,98 | -0,84 | $8,10 \times 10^{-1}$ | $1,21 \times 10^{-1}$ | $1,94 \times 10^{-2}$ | $4,04 \times 10^{-2}$ |
|         | K121Me3            | HLQLAIRGDEELDSLKATI-<br>AGGGVIPHIHKSIGKKGQ<br>QKTA   | -0,08  | -0,56 | -0,98 | -0,84 | $8,10 \times 10^{-1}$ | $1,21 \times 10^{-1}$ | $1,94 \times 10^{-2}$ | $4,04 \times 10^{-2}$ |
|         | K121But            | HLQLAIRGDEELDSLKATI-<br>AGGGVIPHIHKSIGKKGQ<br>QKTA   | -0,20  | -1,55 | -0,87 | -0,63 | $5,91 \times 10^{-1}$ | $2,93 \times 10^{-3}$ | $4,95 \times 10^{-2}$ | $0,14 \times 10^{-1}$ |
|         | K125Me3            | HLQLAIRGDEELDSLKATI-<br>AGGGVIPHIHKSIGKKGQ<br>QKTA   | -0,08  | -0,56 | -0,98 | -0,84 | $8,10 \times 10^{-1}$ | $1,21 \times 10^{-1}$ | $1,94 \times 10^{-2}$ | $4,04 \times 10^{-2}$ |
| H2A.FY  | K33B <sub>ut</sub> | YIKKGHPKYR                                           | -0,04  | -0,90 | -1,32 | 0,56  | $8,36 \times 10^{-1}$ | $1,72 \times 10^{-3}$ | $5,90 \times 10^{-5}$ | $0,38 \times 10^{-1}$ |
|         | K34Me3             | YIKKGHPKYR                                           | -0,04  | -0,90 | -1,32 | 0,56  | $8,36 \times 10^{-1}$ | $1,72 \times 10^{-3}$ | $5,90 \times 10^{-5}$ | $0,38 \times 10^{-1}$ |
|         | R79Me              | VTPRHILLA-<br>VANDEELNQLLKGVTIASG<br>GVLPNIHPELLAKKR | 0,09   | 0,55  | 0,62  | 0,73  | $8,19 \times 10^{-1}$ | $9,05 \times 10^{-2}$ | $7,74 \times 10^{-2}$ | $2,34 \times 10^{-2}$ |
| H3      | K18Ac              | KQLATKAAR                                            | -0,61  | -5,01 | -2,99 | -3,30 | $4,03 \times 10^{-1}$ | $1,67 \times 10^{-2}$ | $3,11 \times 10^{-2}$ | $3,31 \times 10^{-2}$ |



|    |                    |                  |       |       |       |       |                         |                         |                         |                         |
|----|--------------------|------------------|-------|-------|-------|-------|-------------------------|-------------------------|-------------------------|-------------------------|
|    | K27A <sub>c</sub>  | KSAPATGGVKKPHR   | -0,40 | -0,56 | -0,72 | -0,56 | 1,38 × 10 <sup>-1</sup> | 6,21 × 10 <sup>-2</sup> | 2,19 × 10 <sup>-2</sup> | 8,62 × 10 <sup>-2</sup> |
|    | K37M <sub>e3</sub> | KSAPATGGVKKPHR   | -0,91 | -2,79 | -2,80 | -2,03 | 7,09 × 10 <sup>-2</sup> | 8,88 × 10 <sup>-4</sup> | 9,00 × 10 <sup>-4</sup> | 5,21 × 10 <sup>-3</sup> |
|    | K37B <sub>u</sub>  | KSAPSTGGVKKPHR   | -0,11 | 0,19  | 0,17  | 0,34  | 3,94 × 10 <sup>-1</sup> | 1,27 × 10 <sup>-1</sup> | 1,91 × 10 <sup>-1</sup> | 2,02 × 10 <sup>-3</sup> |
|    | R40C <sub>it</sub> | KSAPATGGVKKPHR   | 0,12  | 0,45  | 0,31  | 0,66  | 4,46 × 10 <sup>-1</sup> | 5,00 × 10 <sup>-4</sup> | 6,95 × 10 <sup>-2</sup> | 3,99 × 10 <sup>-5</sup> |
|    | D77F <sub>e</sub>  | EIAQDFKTDLR      | 0,25  | 0,73  | 0,78  | 0,62  | 2,73 × 10 <sup>-1</sup> | 1,79 × 10 <sup>-4</sup> | 6,56 × 10 <sup>-5</sup> | 5,31 × 10 <sup>-3</sup> |
|    | K79B <sub>ut</sub> | EIAQDFKTDLR      | 0,04  | 0,25  | 0,11  | 0,74  | 7,54 × 10 <sup>-1</sup> | 4,46 × 10 <sup>-2</sup> | 3,66 × 10 <sup>-1</sup> | 2,48 × 10 <sup>-4</sup> |
|    | K79M <sub>e3</sub> | EIAQDFKTDLR      | -0,27 | -0,84 | -0,80 | -1,07 | 4,76 × 10 <sup>-2</sup> | 1,14 × 10 <sup>-6</sup> | 2,40 × 10 <sup>-6</sup> | 1,45 × 10 <sup>-7</sup> |
|    | R83C <sub>it</sub> | EIAQDFKTDLR      | 0,01  | 0,22  | -0,08 | 0,94  | 9,72 × 10 <sup>-1</sup> | 3,56 × 10 <sup>-1</sup> | 7,61 × 10 <sup>-1</sup> | 3,99 × 10 <sup>-3</sup> |
|    | M97O <sub>x</sub>  | VTIMPKDIQLAR     | 0,57  | 1,43  | 1,39  | 1,32  | 1,36 × 10 <sup>-2</sup> | 2,49 × 10 <sup>-2</sup> | 2,46 × 10 <sup>-2</sup> | 2,48 × 10 <sup>-2</sup> |
|    | D100 <sub>Fe</sub> | VTIMPKDIQLAR     | 0,56  | 1,57  | 2,25  | 1,38  | 1,43 × 10 <sup>-1</sup> | 2,83 × 10 <sup>-1</sup> | 0,35 × 10 <sup>-1</sup> | 0,27 × 10 <sup>-1</sup> |
| H4 | R17M <sub>e</sub>  | GKGGKGLGKGGAKRHR | -0,17 | 0,47  | 0,02  | 0,53  | 5,09 × 10 <sup>-1</sup> | 2,53 × 10 <sup>-2</sup> | 9,31 × 10 <sup>-1</sup> | 1,02 × 10 <sup>-2</sup> |
|    | E63Fe              | GVLKVFLENVIR     | 0,37  | 0,88  | 0,96  | 0,60  | 4,50 × 10 <sup>-1</sup> | 2,32 × 10 <sup>-2</sup> | 1,51 × 10 <sup>-2</sup> | 0,18 × 10 <sup>-1</sup> |
|    | M84O <sub>x</sub>  | KTVTAMDVVYALKR   | 0,12  | 0,29  | 0,29  | 0,28  | 2,46 × 10 <sup>-1</sup> | 3,92 × 10 <sup>-3</sup> | 3,81 × 10 <sup>-3</sup> | 7,12 × 10 <sup>-3</sup> |
|    | D85F <sub>e</sub>  | KTVTAMDVVYALKR   | 0,09  | 0,57  | 0,54  | 0,52  | 5,36 × 10 <sup>-1</sup> | 1,56 × 10 <sup>-5</sup> | 1,23 × 10 <sup>-4</sup> | 4,66 × 10 <sup>-4</sup> |

**Table S2.** Overview of primers used in this study.

| Target                           |         | Primer Sequence                    | Gene Accession Number |
|----------------------------------|---------|------------------------------------|-----------------------|
| qPCR primers                     |         |                                    |                       |
| CHAC1                            | Forward | ATG CCT GGC CGT GTG G              | ENSG00000128965       |
|                                  | Reverse | GCT TAC CTG CTC CCC TTG C          |                       |
| HSPB1                            | Forward | AGG ATG GCG TGG TGG AGA T          | ENSG00000106211       |
|                                  | Reverse | GAT GTA GCC ATG CTC GTC CTG        |                       |
| SLC7A11                          | Forward | CAC ATG CCT CTT CAT GGT TG         | ENSG00000151012       |
|                                  | Reverse | AGT GAT GAC GAA GCC AAT CC         |                       |
| HMOX1                            | Forward | CCA GCG GGC CAG CAA CAA<br>AGT GC  | ENSG00000100292       |
|                                  | Reverse | AAG CCT TCA GTG CCC ACG<br>GTA AGG |                       |
| ACTB                             | Forward | CTG GAA CGG TGA AGG TGA CA         | ENSG00000075624       |
|                                  | Reverse | AAG GGA CTTC CTG TAA CAA<br>TGC A  |                       |
| NR4A2                            | Forward | GGT CCC TTT TGC CTG TCC A          | ENSG00000153234       |
|                                  | Reverse | TGG CTT CAG CCG AGT TAC AG         |                       |
| Methylation-specific PCR primers |         |                                    |                       |
| SALL3                            | Forward | GTT TGG GTT TGG TTT TTG TT         | ENSG00000263310       |

|        |            |                                   |                                      |
|--------|------------|-----------------------------------|--------------------------------------|
|        |            | Reverse                           | ACC CTT TAC CAA TCT CTT AAC<br>TTT C |
|        |            | <i>Pyrosequencing primers</i>     |                                      |
|        |            | Forward                           | TTT TTT GAG TTA GGT GTG GG           |
| LINE-1 | Reverse    | TCT CAC TAA AAA ATA CCA<br>AAC AA |                                      |
|        | Sequencing | GGG TGG GAG TGA T                 |                                      |

**Table S3.** Original images western blot analysis.

| Figure                                                                                                                                  | Blot(s) with molecular marker                                                                                                                                                                                                                                                                                                                                                                                                                                                                                                                                                                                                                                                      |
|-----------------------------------------------------------------------------------------------------------------------------------------|------------------------------------------------------------------------------------------------------------------------------------------------------------------------------------------------------------------------------------------------------------------------------------------------------------------------------------------------------------------------------------------------------------------------------------------------------------------------------------------------------------------------------------------------------------------------------------------------------------------------------------------------------------------------------------|
| 7: Western blot detection and quantification of NR4A2 and GAPDH protein expression levels after RSL3 treatment in MM1 cells             | <p><math>\alpha</math>-NR4A2 ( 70 kDa) and <math>\alpha</math>-GAPDH (37 kDa)<br/> <i>marker:</i> Benchmark Pre-stained protein standard (Thermo, #10748-010)</p> 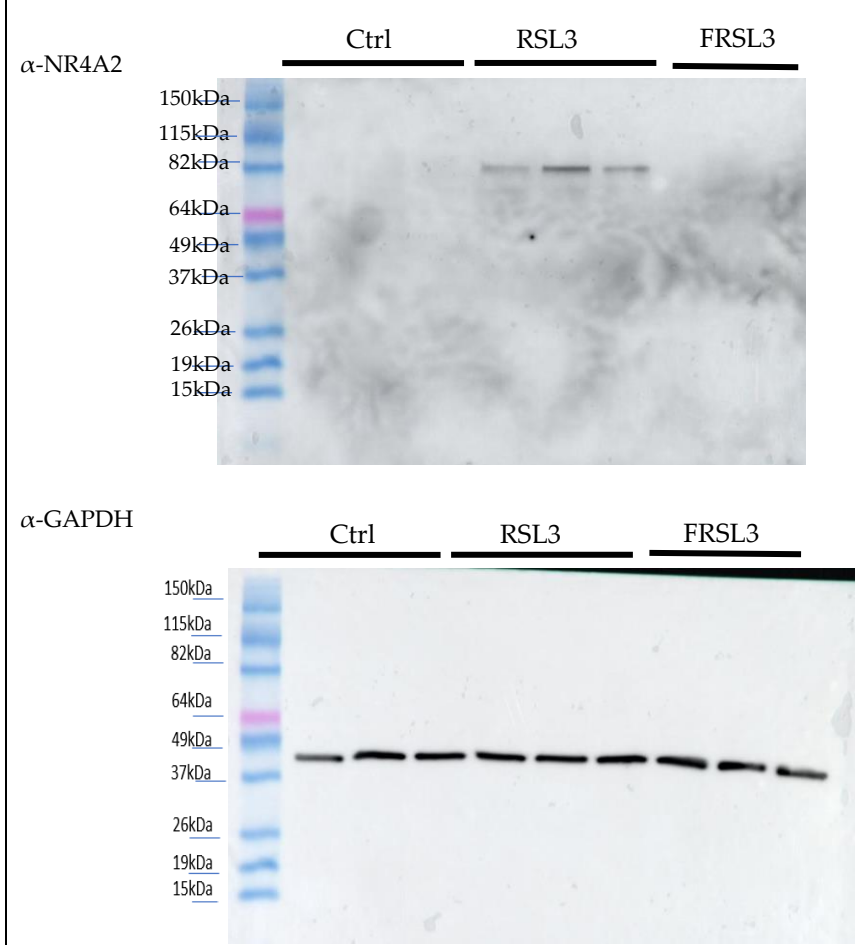 <p>The figure displays two Western blot images. The top image is labeled <math>\alpha</math>-NR4A2 and shows protein bands at approximately 70 kDa for Ctrl, RSL3, and FRSL3 treatments. The bottom image is labeled <math>\alpha</math>-GAPDH and shows protein bands at approximately 37 kDa for the same treatments. Molecular weight markers are indicated on the left of each blot, ranging from 150 kDa to 15 kDa.</p> |
| S5a: Western blot detection and quantification of H3K27ac, H3K36me, and H3 protein expression levels after RSL3 treatment in MM1R cells | <p><math>\alpha</math>-H3K27ac (15 kDa), and <math>\alpha</math>-H3 ( 11 kDa)<br/> <i>marker:</i> Precision Plus Protein All Blue prestained protein standard (Bio-Rad, #1610373)</p>  <p>The figure displays a Western blot image for <math>\alpha</math>-H3K27ac. The blot shows protein bands at approximately 15 kDa for Ctrl, RSL3 1h, RSL3 2h, RSL3 4h, and RSL3 8h treatments. Molecular weight markers are indicated on the left of the blot, ranging from 150 kDa to 15 kDa.</p>                                                                                                       |

$\alpha$ -H3

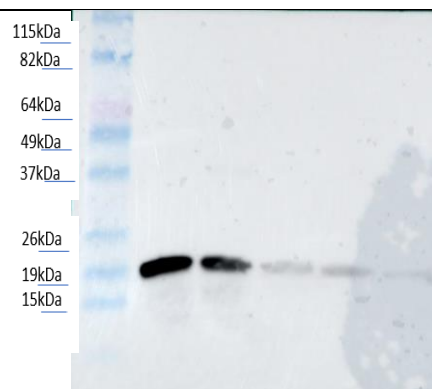

$\alpha$ -H3K36me (full length kDa, and  $\alpha$ -H3 ( 11 kDa)

*marker:* Precision Plus Protein All Blue prestained protein standard (Bio-Rad, #1610373)

$\alpha$ -H3K36me

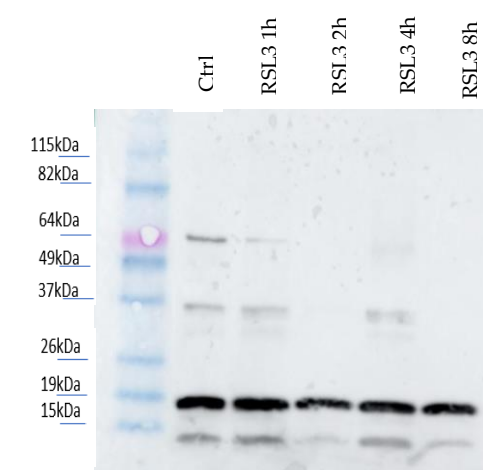

$\alpha$ -H3

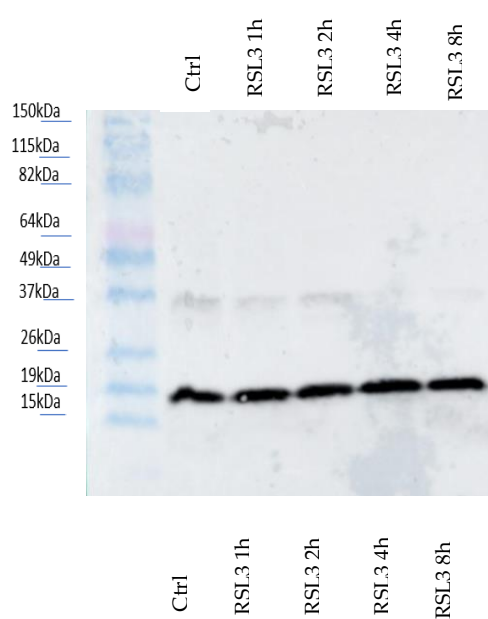

|                                                                                                                                           |                                                                                                                                                                                                                                                                                                                                                                                                                                                                                                                                                                                                                                                                                                                       |         |         |         |          |         |          |                                                                                      |  |  |  |  |  |  |      |         |         |         |          |                                                                                      |  |  |  |  |  |
|-------------------------------------------------------------------------------------------------------------------------------------------|-----------------------------------------------------------------------------------------------------------------------------------------------------------------------------------------------------------------------------------------------------------------------------------------------------------------------------------------------------------------------------------------------------------------------------------------------------------------------------------------------------------------------------------------------------------------------------------------------------------------------------------------------------------------------------------------------------------------------|---------|---------|---------|----------|---------|----------|--------------------------------------------------------------------------------------|--|--|--|--|--|--|------|---------|---------|---------|----------|--------------------------------------------------------------------------------------|--|--|--|--|--|
|                                                                                                                                           | 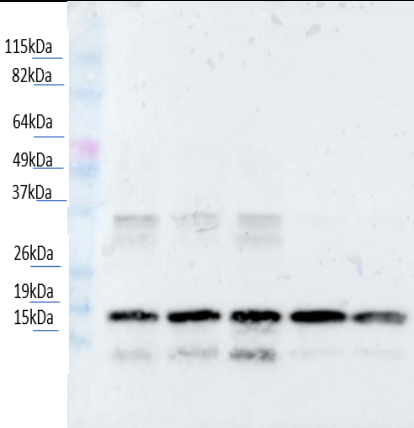                                                                                                                                                                                                                                                                                                                                                                                                                                                                                                                                                                                                                                    |         |         |         |          |         |          |                                                                                      |  |  |  |  |  |  |      |         |         |         |          |                                                                                      |  |  |  |  |  |
| <p><b>S5b:</b> Western blot detection and quantification of pH2AX and H3 protein expression levels after RSL3 treatment in MM1R cells</p> | <p>α-pH2AX (15 kDa), and α-GAPDH ( 37 kDa)<br/><i>marker:</i> Precision Plus Protein All Blue prestained protein standard (Bio-Rad, #1610373)</p> <p>α-pH2AX</p> <table><tr><td></td><td>Ctrl</td><td>RSL3 1h</td><td>RSL3 3h</td><td>RSL3 6h</td><td>RSL3 12h</td></tr><tr><td></td><td></td><td></td><td></td><td></td><td></td></tr></table> <p>α-GAPDH</p> <table><tr><td></td><td>Ctrl</td><td>RSL3 1h</td><td>RSL3 3h</td><td>RSL3 6h</td><td>RSL3 12h</td></tr><tr><td></td><td></td><td></td><td></td><td></td><td></td></tr></table> |         | Ctrl    | RSL3 1h | RSL3 3h  | RSL3 6h | RSL3 12h |  |  |  |  |  |  |  | Ctrl | RSL3 1h | RSL3 3h | RSL3 6h | RSL3 12h |  |  |  |  |  |  |
|                                                                                                                                           | Ctrl                                                                                                                                                                                                                                                                                                                                                                                                                                                                                                                                                                                                                                                                                                                  | RSL3 1h | RSL3 3h | RSL3 6h | RSL3 12h |         |          |                                                                                      |  |  |  |  |  |  |      |         |         |         |          |                                                                                      |  |  |  |  |  |
|                                                       |                                                                                                                                                                                                                                                                                                                                                                                                                                                                                                                                                                                                                                                                                                                       |         |         |         |          |         |          |                                                                                      |  |  |  |  |  |  |      |         |         |         |          |                                                                                      |  |  |  |  |  |
|                                                                                                                                           | Ctrl                                                                                                                                                                                                                                                                                                                                                                                                                                                                                                                                                                                                                                                                                                                  | RSL3 1h | RSL3 3h | RSL3 6h | RSL3 12h |         |          |                                                                                      |  |  |  |  |  |  |      |         |         |         |          |                                                                                      |  |  |  |  |  |
|                                                       |                                                                                                                                                                                                                                                                                                                                                                                                                                                                                                                                                                                                                                                                                                                       |         |         |         |          |         |          |                                                                                      |  |  |  |  |  |  |      |         |         |         |          |                                                                                      |  |  |  |  |  |
